# Supplementary material for: Space station biomining experiment demonstrates rare earth element extraction in microgravity and Mars gravity
Source: PubMed Central journal article supplement (PMC7656455; doi:10.1038/s41467-020-19276-w), 2020-11-10
Supplement: 41467_2020_19276_MOESM1_ESM.pdf [file 41467_2020_19276_MOESM1_ESM.pdf]

**Supplementary information for**

*Space station biomining experiment demonstrates rare earth  
element extraction in microgravity and Mars gravity*

**by Cockell, Santomartino et al.**

**Supplementary Fig. 1. Bioleaching and non-biological controls leaching of medium-abundant Rare Earth Elements.** Quantities (ng) of the medium-abundant Rare Earth Elements (REEs) in each of the chambers at the end of the experiment (described in the text) for each of the three organisms examined and non-biological controls. The three most (Ce, Nd, La) and least (Tm, Lu, Tb) abundant REEs are shown in Fig. 2. ○ show triplicate biologically independent measurements and the mean is given as ▷. Error bars represent standard deviations.

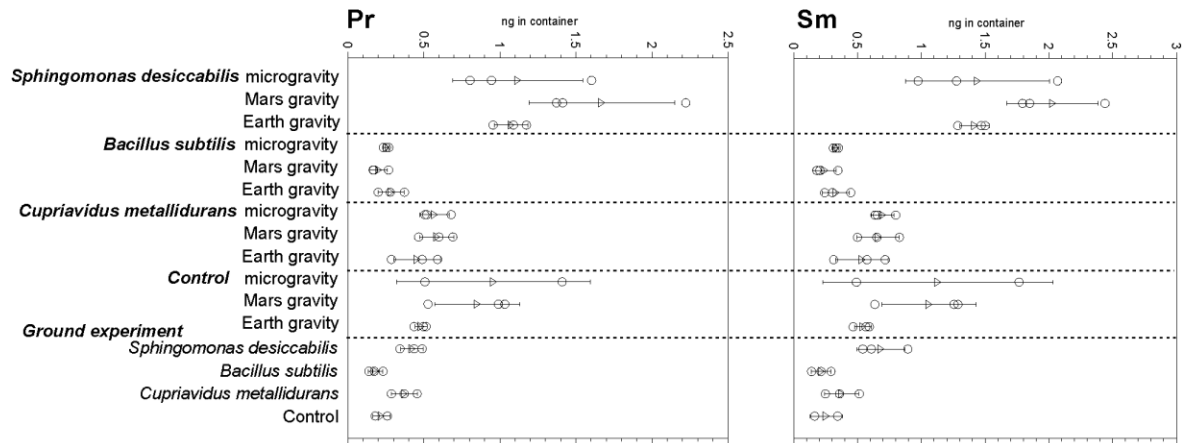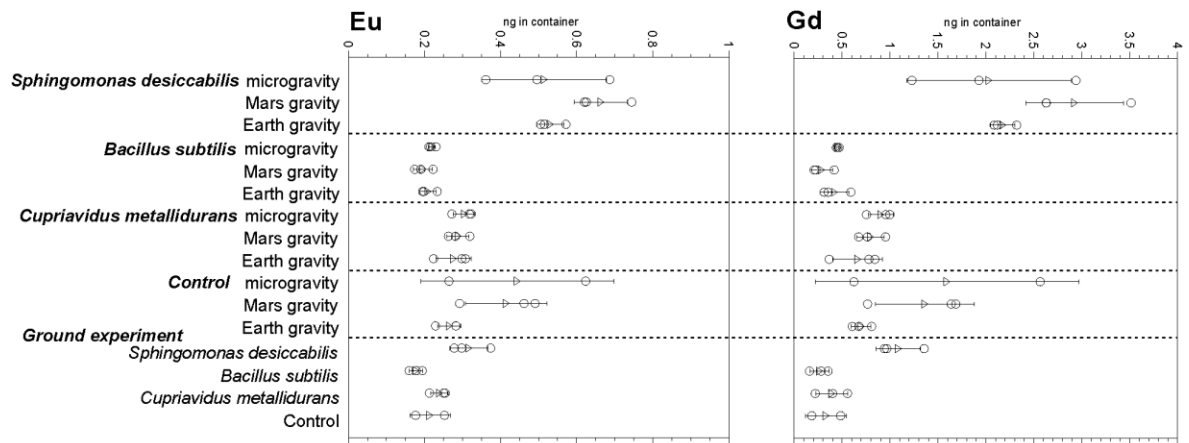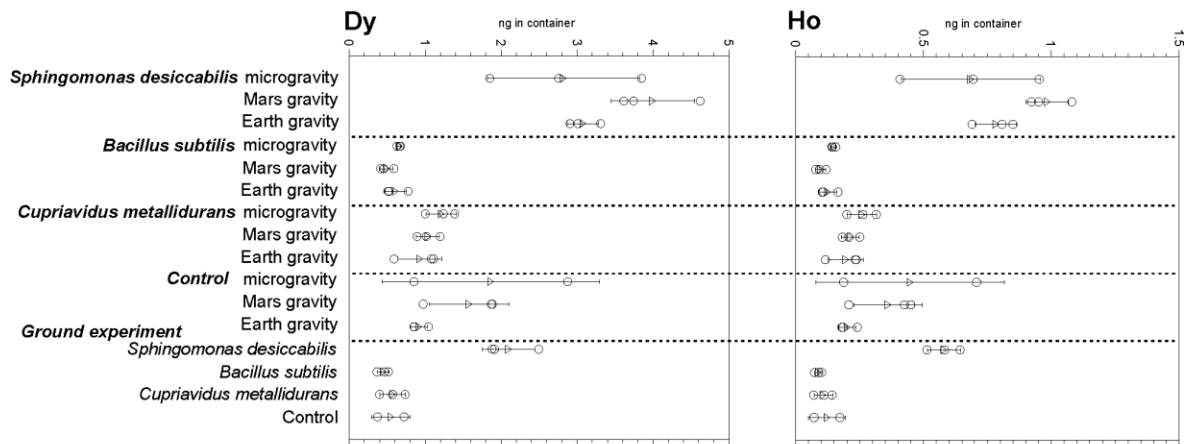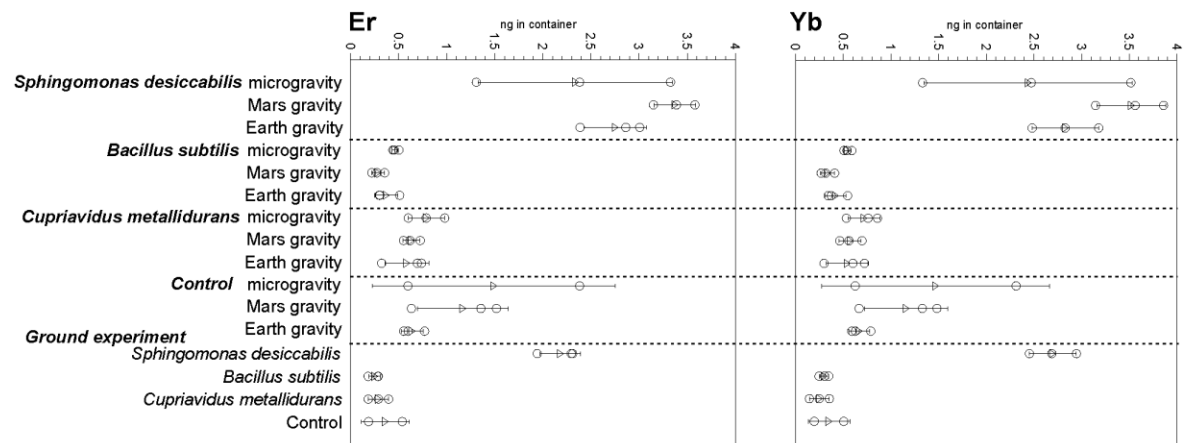

**Supplementary Fig. 2. Ground-based post-flight pH experiments investigating the pH during cultivation.** Figure shows pH of the culture medium with the three microorganisms and the non-biological negative control, with (solid lines) and without (dotted lines) the presence of the basalt rock, during the main experimental timeframe and after NOTOXhisto fixation (day 21). The pH was measured twice on day 21, before and after fixative addition. Mean values (n=3, black dots) for each sample are plotted, and error bars (in red) indicate standard deviations of three biologically independent samples.

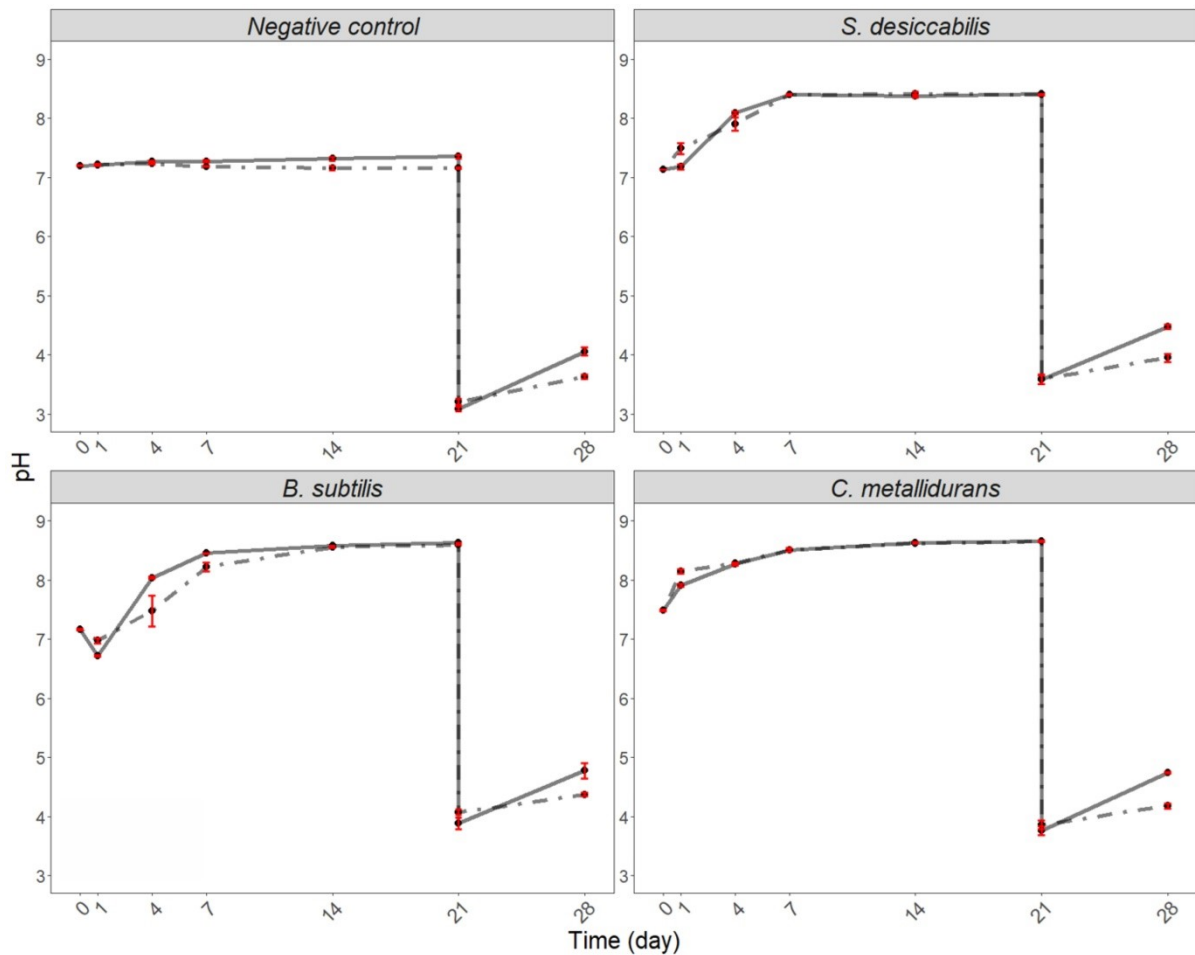

**Supplementary Table 1.** Abundance of major elements in basaltic rock (%) used for the BioRock experiment, reported in the standard form as equivalent oxide concentrations.

| <b>Mineral</b>                 | <b>Element</b> | <b>%</b> |
|--------------------------------|----------------|----------|
| Na <sub>2</sub> O              | Sodium (Na)    | 1.92     |
| MgO                            | Magnesium (Mg) | 10.00    |
| Al <sub>2</sub> O <sub>3</sub> | Aluminum (Al)  | 15.35    |
| SiO <sub>2</sub>               | Silicon (Si)   | 47.48    |
| P <sub>2</sub> O <sub>5</sub>  | Phosphorus (P) | 0.128    |
| K <sub>2</sub> O               | Potassium (K)  | 0.162    |
| CaO                            | Calcium (Ca)   | 11.69    |
| TiO <sub>2</sub>               | Titanium (Ti)  | 1.344    |
| MnO                            | Manganese (Mn) | 0.186    |
| Fe <sub>2</sub> O <sub>3</sub> | Iron (Fe)      | 12.12    |

**Supplementary Table 2.** Mean ( $\pm$  standard deviation) of quantities of total REEs (ng) in the chamber fluid (6 mL) at the end of the experiment shown to two decimal places. All data points shown in Fig. 2 and Supplementary Fig. 1. Mars gravity and Earth gravity refer to simulated Martian (0.4 x g) and terrestrial (1 x g) gravity on ISS.

| Organism/gravity                  |                         | La              | Ce              | Pr              | Nd              | Sm              | Eu              | Gd              | Tb              | Dy              | Ho              | Er              | Tm              | Yb              | Lu              |
|-----------------------------------|-------------------------|-----------------|-----------------|-----------------|-----------------|-----------------|-----------------|-----------------|-----------------|-----------------|-----------------|-----------------|-----------------|-----------------|-----------------|
| <i>S. desiccabilis</i><br>on ISS  | Microgravity            | 3.60 $\pm$ 1.26 | 8.85 $\pm$ 2.89 | 1.12 $\pm$ 0.43 | 5.35 $\pm$ 2.02 | 1.44 $\pm$ 0.57 | 0.51 $\pm$ 0.16 | 2.03 $\pm$ 0.86 | 0.42 $\pm$ 0.14 | 2.82 $\pm$ 1.00 | 0.69 $\pm$ 0.27 | 2.34 $\pm$ 1.01 | 0.42 $\pm$ 0.16 | 2.44 $\pm$ 1.09 | 0.49 $\pm$ 0.20 |
|                                   | Mars gravity            | 4.96 $\pm$ 0.51 | 9.26 $\pm$ 1.94 | 1.67 $\pm$ 0.48 | 7.89 $\pm$ 1.99 | 2.03 $\pm$ 0.36 | 0.66 $\pm$ 0.07 | 2.93 $\pm$ 0.51 | 0.57 $\pm$ 0.08 | 3.99 $\pm$ 0.55 | 0.98 $\pm$ 0.08 | 3.37 $\pm$ 0.22 | 0.58 $\pm$ 0.04 | 3.52 $\pm$ 0.36 | 0.68 $\pm$ 0.08 |
|                                   | Earth gravity           | 3.74 $\pm$ 0.51 | 7.18 $\pm$ 0.99 | 1.07 $\pm$ 0.11 | 5.20 $\pm$ 0.47 | 1.42 $\pm$ 0.12 | 0.53 $\pm$ 0.04 | 2.18 $\pm$ 0.13 | 0.44 $\pm$ 0.01 | 3.08 $\pm$ 0.21 | 0.78 $\pm$ 0.08 | 2.75 $\pm$ 0.32 | 0.49 $\pm$ 0.06 | 2.83 $\pm$ 0.35 | 0.57 $\pm$ 0.07 |
| <i>B. subtilis</i><br>on ISS      | Microgravity            | 0.80 $\pm$ 0.04 | 2.83 $\pm$ 0.59 | 0.25 $\pm$ 0.02 | 1.27 $\pm$ 0.07 | 0.33 $\pm$ 0.02 | 0.22 $\pm$ 0.01 | 0.45 $\pm$ 0.01 | 0.13 $\pm$ 0.00 | 0.66 $\pm$ 0.03 | 0.15 $\pm$ 0.01 | 0.47 $\pm$ 0.03 | 0.14 $\pm$ 0.01 | 0.55 $\pm$ 0.04 | 0.17 $\pm$ 0.01 |
|                                   | Mars gravity            | 0.61 $\pm$ 0.13 | 2.32 $\pm$ 0.19 | 0.20 $\pm$ 0.06 | 0.98 $\pm$ 0.28 | 0.24 $\pm$ 0.09 | 0.20 $\pm$ 0.02 | 0.28 $\pm$ 0.12 | 0.11 $\pm$ 0.02 | 0.49 $\pm$ 0.09 | 0.10 $\pm$ 0.02 | 0.28 $\pm$ 0.07 | 0.11 $\pm$ 0.01 | 0.33 $\pm$ 0.07 | 0.12 $\pm$ 0.01 |
|                                   | Earth gravity           | 0.98 $\pm$ 0.34 | 3.59 $\pm$ 0.63 | 0.28 $\pm$ 0.09 | 1.31 $\pm$ 0.39 | 0.33 $\pm$ 0.11 | 0.21 $\pm$ 0.02 | 0.42 $\pm$ 0.15 | 0.12 $\pm$ 0.02 | 0.61 $\pm$ 0.15 | 0.13 $\pm$ 0.04 | 0.37 $\pm$ 0.12 | 0.12 $\pm$ 0.02 | 0.42 $\pm$ 0.11 | 0.15 $\pm$ 0.02 |
| <i>C. metallidurans</i><br>on ISS | Microgravity            | 1.88 $\pm$ 0.21 | 3.58 $\pm$ 0.63 | 0.57 $\pm$ 0.10 | 2.59 $\pm$ 0.47 | 0.70 $\pm$ 0.09 | 0.30 $\pm$ 0.03 | 0.90 $\pm$ 0.13 | 0.21 $\pm$ 0.02 | 1.21 $\pm$ 0.20 | 0.26 $\pm$ 0.06 | 0.79 $\pm$ 0.19 | 0.17 $\pm$ 0.03 | 0.72 $\pm$ 0.17 | 0.18 $\pm$ 0.03 |
|                                   | Mars gravity            | 2.00 $\pm$ 0.28 | 4.02 $\pm$ 0.42 | 0.59 $\pm$ 0.11 | 2.62 $\pm$ 0.56 | 0.66 $\pm$ 0.16 | 0.29 $\pm$ 0.03 | 0.80 $\pm$ 0.14 | 0.19 $\pm$ 0.03 | 1.04 $\pm$ 0.15 | 0.21 $\pm$ 0.03 | 0.63 $\pm$ 0.09 | 0.15 $\pm$ 0.01 | 0.57 $\pm$ 0.12 | 0.16 $\pm$ 0.02 |
|                                   | Earth gravity           | 1.61 $\pm$ 0.48 | 2.88 $\pm$ 0.74 | 0.46 $\pm$ 0.15 | 2.15 $\pm$ 0.80 | 0.54 $\pm$ 0.21 | 0.28 $\pm$ 0.05 | 0.66 $\pm$ 0.26 | 0.17 $\pm$ 0.04 | 0.93 $\pm$ 0.29 | 0.20 $\pm$ 0.07 | 0.59 $\pm$ 0.23 | 0.15 $\pm$ 0.03 | 0.54 $\pm$ 0.22 | 0.16 $\pm$ 0.04 |
| Non-biological<br>control on ISS  | Microgravity            | 3.22 $\pm$ 2.20 | 6.45 $\pm$ 3.99 | 0.96 $\pm$ 0.64 | 4.68 $\pm$ 3.49 | 1.13 $\pm$ 0.90 | 0.44 $\pm$ 0.25 | 1.60 $\pm$ 1.37 | 0.30 $\pm$ 0.21 | 1.86 $\pm$ 1.43 | 0.45 $\pm$ 0.37 | 1.49 $\pm$ 1.26 | 0.29 $\pm$ 0.19 | 1.47 $\pm$ 1.19 | 0.33 $\pm$ 0.22 |
|                                   | Mars gravity            | 2.56 $\pm$ 0.89 | 5.79 $\pm$ 2.06 | 0.85 $\pm$ 0.28 | 4.28 $\pm$ 1.46 | 1.06 $\pm$ 0.37 | 0.42 $\pm$ 0.11 | 1.36 $\pm$ 0.52 | 0.26 $\pm$ 0.07 | 1.58 $\pm$ 0.52 | 0.36 $\pm$ 0.13 | 1.17 $\pm$ 0.47 | 0.24 $\pm$ 0.07 | 1.16 $\pm$ 0.44 | 0.27 $\pm$ 0.08 |
|                                   | Earth gravity           | 1.66 $\pm$ 0.23 | 4.39 $\pm$ 1.26 | 0.48 $\pm$ 0.04 | 2.28 $\pm$ 0.24 | 0.54 $\pm$ 0.07 | 0.27 $\pm$ 0.03 | 0.70 $\pm$ 0.10 | 0.16 $\pm$ 0.02 | 0.92 $\pm$ 0.11 | 0.20 $\pm$ 0.03 | 0.64 $\pm$ 0.11 | 0.16 $\pm$ 0.01 | 0.67 $\pm$ 0.11 | 0.18 $\pm$ 0.02 |
| Ground 1 g<br>experiment          | <i>S. desiccabilis</i>  | 1.20 $\pm$ 0.24 | 3.65 $\pm$ 0.19 | 0.42 $\pm$ 0.07 | 2.20 $\pm$ 0.51 | 0.68 $\pm$ 0.19 | 0.32 $\pm$ 0.05 | 1.09 $\pm$ 0.23 | 0.28 $\pm$ 0.05 | 2.10 $\pm$ 0.35 | 0.58 $\pm$ 0.06 | 2.18 $\pm$ 0.21 | 0.43 $\pm$ 0.04 | 2.70 $\pm$ 0.25 | 0.57 $\pm$ 0.06 |
|                                   | <i>B. subtilis</i>      | 0.56 $\pm$ 0.16 | 2.80 $\pm$ 0.15 | 0.18 $\pm$ 0.05 | 0.87 $\pm$ 0.26 | 0.22 $\pm$ 0.08 | 0.18 $\pm$ 0.02 | 0.27 $\pm$ 0.10 | 0.10 $\pm$ 0.01 | 0.45 $\pm$ 0.08 | 0.09 $\pm$ 0.01 | 0.25 $\pm$ 0.06 | 0.10 $\pm$ 0.01 | 0.30 $\pm$ 0.05 | 0.12 $\pm$ 0.01 |
|                                   | <i>C. metallidurans</i> | 1.30 $\pm$ 0.26 | 3.63 $\pm$ 0.15 | 0.37 $\pm$ 0.08 | 1.61 $\pm$ 0.44 | 0.37 $\pm$ 0.13 | 0.24 $\pm$ 0.02 | 0.39 $\pm$ 0.17 | 0.12 $\pm$ 0.03 | 0.57 $\pm$ 0.17 | 0.11 $\pm$ 0.04 | 0.29 $\pm$ 0.10 | 0.10 $\pm$ 0.02 | 0.25 $\pm$ 0.10 | 0.10 $\pm$ 0.02 |
|                                   | Control (non-biology)   | 0.84 $\pm$ 0.22 | 3.81 $\pm$ 1.99 | 0.23 $\pm$ 0.06 | 1.09 $\pm$ 0.35 | 0.27 $\pm$ 0.13 | 0.13 $\pm$ 0.05 | 0.44 $\pm$ 0.21 | 0.06 $\pm$ 0.03 | 0.47 $\pm$ 0.25 | 0.12 $\pm$ 0.07 | 0.43 $\pm$ 0.25 | 0.06 $\pm$ 0.03 | 0.40 $\pm$ 0.22 | 0.07 $\pm$ 0.04 |

**Supplementary Table 3.** Percent difference in mean ( $\pm$  standard deviation) leached concentration of REEs in biological experiments compared to experimental non-biological controls. Mars gravity and Earth gravity refer to simulated Martian (0.4 x g) and terrestrial (1 x g) gravity on the ISS. Ground experiment was performed at 1 x g (true Earth gravity).

| Organism/gravity                                |                         | La               | Ce               | Pr               | Nd               | Sm                | Eu               | Gd                | Tb                | Dy                | Ho                | Er                | Tm                | Yb                | Lu                |
|-------------------------------------------------|-------------------------|------------------|------------------|------------------|------------------|-------------------|------------------|-------------------|-------------------|-------------------|-------------------|-------------------|-------------------|-------------------|-------------------|
| <b><i>S. desiccabilis</i></b><br><b>on ISS</b>  | Microgravity            | 111.9 $\pm$ 85.8 | 137.2 $\pm$ 96.0 | 116.6 $\pm$ 89.4 | 114.2 $\pm$ 95.6 | 127.4 $\pm$ 113.3 | 115.9 $\pm$ 75.9 | 127.4 $\pm$ 122.2 | 137.7 $\pm$ 103.6 | 151.2 $\pm$ 12.8  | 153.1 $\pm$ 139.8 | 157.0 $\pm$ 149.3 | 148.1 $\pm$ 112.2 | 166.0 $\pm$ 153.8 | 146.0 $\pm$ 115.6 |
|                                                 | Mars gravity            | 193.6 $\pm$ 69.9 | 159.8 $\pm$ 66.0 | 196.3 $\pm$ 85.8 | 184.4 $\pm$ 78.4 | 191.2 $\pm$ 74.3  | 159.8 $\pm$ 44.5 | 214.6 $\pm$ 89.7  | 215.5 $\pm$ 67.0  | 253.2 $\pm$ 90.7  | 272.5 $\pm$ 103.6 | 288.7 $\pm$ 117.8 | 241.8 $\pm$ 71.1  | 303.5 $\pm$ 117.9 | 249.6 $\pm$ 77.2  |
|                                                 | Earth gravity           | 225.5 $\pm$ 44.0 | 163.6 $\pm$ 52.0 | 222.3 $\pm$ 29.9 | 228.7 $\pm$ 31.8 | 261.6 $\pm$ 38.6  | 200.3 $\pm$ 26.9 | 311.9 $\pm$ 49.1  | 268.2 $\pm$ 27.0  | 335.3 $\pm$ 46.8  | 387.3 $\pm$ 76.5  | 429.2 $\pm$ 92.0  | 308.0 $\pm$ 45.5  | 423.0 $\pm$ 85.3  | 311.9 $\pm$ 49.8  |
| <b><i>B. subtilis</i></b><br><b>on ISS</b>      | Microgravity            | 24.9 $\pm$ 17.0  | 43.9 $\pm$ 28.6  | 26.4 $\pm$ 17.7  | 27.1 $\pm$ 20.3  | 29.4 $\pm$ 23.5   | 49.5 $\pm$ 28.4  | 28.5 $\pm$ 24.6   | 44.4 $\pm$ 30.1   | 35.3 $\pm$ 27.1   | 32.9 $\pm$ 27.1   | 31.2 $\pm$ 26.6   | 48.7 $\pm$ 32.0   | 37.1 $\pm$ 30.2   | 51.6 $\pm$ 35.0   |
|                                                 | Mars gravity            | 23.7 $\pm$ 9.7   | 40.0 $\pm$ 14.6  | 23.8 $\pm$ 10.3  | 22.9 $\pm$ 10.2  | 23.1 $\pm$ 11.7   | 47.2 $\pm$ 13.5  | 20.8 $\pm$ 11.6   | 41.0 $\pm$ 13.1   | 30.9 $\pm$ 11.7   | 26.9 $\pm$ 11.4   | 24.4 $\pm$ 11.4   | 45.0 $\pm$ 13.5   | 28.6 $\pm$ 12.4   | 46.0 $\pm$ 14.0   |
|                                                 | Earth gravity           | 58.8 $\pm$ 22.2  | 81.7 $\pm$ 27.5  | 58.9 $\pm$ 18.6  | 57.7 $\pm$ 18.3  | 61.1 $\pm$ 20.7   | 78.9 $\pm$ 12.2  | 60.2 $\pm$ 23.2   | 76.3 $\pm$ 16.3   | 66.0 $\pm$ 17.9   | 62.2 $\pm$ 20.2   | 58.2 $\pm$ 21.5   | 75.6 $\pm$ 12.1   | 62.9 $\pm$ 19.3   | 80.5 $\pm$ 14.5   |
| <b><i>C. metallidurans</i></b><br><b>on ISS</b> | Microgravity            | 58.4 $\pm$ 40.4  | 55.5 $\pm$ 35.7  | 59.4 $\pm$ 40.8  | 55.4 $\pm$ 42.6  | 61.8 $\pm$ 49.9   | 68.6 $\pm$ 39.7  | 56.6 $\pm$ 49.4   | 69.5 $\pm$ 47.8   | 64.9 $\pm$ 50.9   | 58.0 $\pm$ 49.4   | 53.0 $\pm$ 46.7   | 61.1 $\pm$ 41.3   | 48.9 $\pm$ 41.3   | 55.2 $\pm$ 38.3   |
|                                                 | Mars gravity            | 78.2 $\pm$ 29.3  | 69.4 $\pm$ 25.7  | 68.8 $\pm$ 26.3  | 61.3 $\pm$ 24.7  | 62.3 $\pm$ 26.6   | 69.4 $\pm$ 19.2  | 58.4 $\pm$ 24.5   | 71.5 $\pm$ 22.4   | 65.6 $\pm$ 23.8   | 59.2 $\pm$ 23.9   | 54.1 $\pm$ 23.1   | 63.9 $\pm$ 19.0   | 49.4 $\pm$ 21.1   | 59.1 $\pm$ 18.0   |
|                                                 | Earth gravity           | 97.1 $\pm$ 31.9  | 65.6 $\pm$ 25.3  | 94.5 $\pm$ 33.1  | 94.6 $\pm$ 36.5  | 98.7 $\pm$ 39.8   | 104.3 $\pm$ 21.2 | 95.1 $\pm$ 39.6   | 102.9 $\pm$ 27.1  | 101.0 $\pm$ 34.0  | 97.0 $\pm$ 37.6   | 91.4 $\pm$ 39.1   | 93.2 $\pm$ 21.8   | 81.2 $\pm$ 35.2   | 85.5 $\pm$ 22.0   |
| <b>Ground experiment</b>                        | <i>S. desiccabilis</i>  | 157.8 $\pm$ 54.6 | 96.0 $\pm$ 50.6  | 191.0 $\pm$ 59.6 | 208.5 $\pm$ 84.1 | 267.6 $\pm$ 151.7 | 147.4 $\pm$ 43.7 | 326.0 $\pm$ 219.6 | 258.0 $\pm$ 88.2  | 382.4 $\pm$ 184.1 | 473.3 $\pm$ 282.4 | 601.6 $\pm$ 416.0 | 378.5 $\pm$ 119.5 | 767.4 $\pm$ 482.4 | 440.1 $\pm$ 155.3 |
|                                                 | <i>B. subtilis</i>      | 73.8 $\pm$ 29.6  | 73.6 $\pm$ 38.8  | 82.4 $\pm$ 30.2  | 82.5 $\pm$ 36.5  | 84.8 $\pm$ 51.6   | 82.7 $\pm$ 22.1  | 79.6 $\pm$ 58.6   | 90.9 $\pm$ 28.9   | 81.7 $\pm$ 39.6   | 72.1 $\pm$ 43.8   | 69.6 $\pm$ 50.5   | 90.5 $\pm$ 28.8   | 85.2 $\pm$ 54.9   | 94.8 $\pm$ 32.7   |
|                                                 | <i>C. metallidurans</i> | 171.0 $\pm$ 59.3 | 95.6 $\pm$ 50.3  | 167.6 $\pm$ 57.7 | 152.1 $\pm$ 65.5 | 147.0 $\pm$ 89.8  | 111.3 $\pm$ 29.7 | 117.7 $\pm$ 90.5  | 111.5 $\pm$ 40.6  | 103.9 $\pm$ 56.1  | 88.0 $\pm$ 59.3   | 80.2 $\pm$ 62.1   | 89.4 $\pm$ 30.6   | 71.2 $\pm$ 53.4   | 80.6 $\pm$ 29.6   |

**Supplementary Table 4.** Statistical (two-tailed Student's *t*-test) *p* values of differences between selected treatments shown in Supplementary

Table 2. *P* values below 0.05 are shaded dark blue and those below 0.1 are shaded light green. 'Control' refers to non-biological control

|                                                      | La    | Ce    | Pr    | Nd    | Sm    | Eu    | Gd    | Tb    | Dy    | Ho    | Er    | Tm    | Yb    | Lu    |
|------------------------------------------------------|-------|-------|-------|-------|-------|-------|-------|-------|-------|-------|-------|-------|-------|-------|
| <b><i>S. desiccabilis</i> on ISS</b>                 |       |       |       |       |       |       |       |       |       |       |       |       |       |       |
| Microgravity (biology vs. control)                   | 0.814 | 0.484 | 0.754 | 0.798 | 0.659 | 0.722 | 0.682 | 0.498 | 0.434 | 0.460 | 0.460 | 0.442 | 0.415 | 0.483 |
| Mars gravity (biology vs. control)                   | 0.015 | 0.102 | 0.063 | 0.065 | 0.031 | 0.028 | 0.020 | 0.008 | 0.005 | 0.002 | 0.002 | 0.002 | 0.002 | 0.003 |
| Earth gravity (biology vs. control)                  | 0.003 | 0.039 | 0.001 | 0.001 | 0.000 | 0.001 | 0.000 | 0.000 | 0.000 | 0.000 | 0.000 | 0.001 | 0.001 | 0.001 |
| Microgravity biology vs. Mars gravity biology        | 0.159 | 0.851 | 0.211 | 0.196 | 0.202 | 0.222 | 0.197 | 0.166 | 0.149 | 0.143 | 0.158 | 0.184 | 0.178 | 0.199 |
| Microgravity biology vs. Earth gravity biology       | 0.869 | 0.396 | 0.870 | 0.909 | 0.953 | 0.875 | 0.789 | 0.790 | 0.685 | 0.585 | 0.538 | 0.531 | 0.589 | 0.525 |
| Mars biology vs. Earth gravity biology               | 0.043 | 0.174 | 0.104 | 0.086 | 0.049 | 0.043 | 0.069 | 0.043 | 0.053 | 0.041 | 0.051 | 0.097 | 0.074 | 0.147 |
| <b><i>B. subtilis</i> on ISS</b>                     |       |       |       |       |       |       |       |       |       |       |       |       |       |       |
| Microgravity (biology vs. control)                   | 0.128 | 0.190 | 0.127 | 0.161 | 0.192 | 0.193 | 0.213 | 0.217 | 0.208 | 0.220 | 0.221 | 0.234 | 0.238 | 0.268 |
| Mars gravity (biology vs. control)                   | 0.020 | 0.044 | 0.017 | 0.019 | 0.020 | 0.026 | 0.024 | 0.024 | 0.024 | 0.028 | 0.032 | 0.030 | 0.031 | 0.033 |
| Earth gravity (biology vs. control)                  | 0.045 | 0.378 | 0.023 | 0.022 | 0.042 | 0.061 | 0.057 | 0.079 | 0.043 | 0.053 | 0.049 | 0.036 | 0.049 | 0.099 |
| Microgravity biology vs. Mars gravity biology        | 0.067 | 0.223 | 0.219 | 0.158 | 0.177 | 0.201 | 0.064 | 0.052 | 0.036 | 0.016 | 0.014 | 0.013 | 0.012 | 0.008 |
| Microgravity biology vs. Earth gravity biology       | 0.433 | 0.203 | 0.570 | 0.859 | 0.995 | 0.484 | 0.710 | 0.532 | 0.584 | 0.356 | 0.270 | 0.142 | 0.142 | 0.163 |
| Mars biology vs. Earth gravity biology               | 0.156 | 0.029 | 0.241 | 0.296 | 0.338 | 0.525 | 0.282 | 0.376 | 0.300 | 0.289 | 0.330 | 0.297 | 0.311 | 0.184 |
| <b><i>C. metallidurans</i> on ISS</b>                |       |       |       |       |       |       |       |       |       |       |       |       |       |       |
| Microgravity (biology vs. control)                   | 0.335 | 0.275 | 0.340 | 0.347 | 0.434 | 0.379 | 0.413 | 0.462 | 0.457 | 0.414 | 0.379 | 0.351 | 0.326 | 0.304 |
| Mars gravity (biology vs. control)                   | 0.377 | 0.175 | 0.214 | 0.148 | 0.164 | 0.155 | 0.147 | 0.172 | 0.163 | 0.140 | 0.126 | 0.098 | 0.088 | 0.074 |
| Earth gravity (biology vs. control)                  | 0.884 | 0.148 | 0.789 | 0.810 | 0.959 | 0.737 | 0.841 | 0.860 | 0.963 | 0.896 | 0.727 | 0.622 | 0.421 | 0.329 |
| Microgravity biology vs. Mars gravity biology        | 0.587 | 0.367 | 0.859 | 0.949 | 0.749 | 0.517 | 0.392 | 0.359 | 0.292 | 0.301 | 0.259 | 0.306 | 0.286 | 0.302 |
| Microgravity biology vs. Earth gravity biology       | 0.426 | 0.281 | 0.345 | 0.456 | 0.277 | 0.419 | 0.224 | 0.204 | 0.235 | 0.285 | 0.298 | 0.360 | 0.330 | 0.382 |
| Mars biology vs. Earth gravity biology               | 0.292 | 0.081 | 0.309 | 0.450 | 0.456 | 0.732 | 0.477 | 0.507 | 0.597 | 0.709 | 0.760 | 0.844 | 0.838 | 0.879 |
| <b>Control comparisons on ISS</b>                    |       |       |       |       |       |       |       |       |       |       |       |       |       |       |
| Microgravity control vs. Mars control                | 0.655 | 0.816 | 0.803 | 0.862 | 0.908 | 0.865 | 0.796 | 0.772 | 0.758 | 0.718 | 0.698 | 0.701 | 0.691 | 0.673 |
| Microgravity control vs. Earth control               | 0.275 | 0.436 | 0.253 | 0.284 | 0.306 | 0.279 | 0.305 | 0.291 | 0.301 | 0.298 | 0.295 | 0.292 | 0.295 | 0.298 |
| Mars control vs. Earth control                       | 0.164 | 0.371 | 0.088 | 0.079 | 0.074 | 0.080 | 0.094 | 0.083 | 0.099 | 0.116 | 0.133 | 0.119 | 0.130 | 0.132 |
| <b>Ground 1 g experiments</b>                        |       |       |       |       |       |       |       |       |       |       |       |       |       |       |
| <i>S. desiccabilis</i> vs. control                   | 0.128 | 0.895 | 0.049 | 0.073 | 0.070 | 0.119 | 0.036 | 0.027 | 0.013 | 0.005 | 0.003 | 0.002 | 0.002 | 0.003 |
| <i>B. subtilis</i> vs. control                       | 0.311 | 0.413 | 0.464 | 0.536 | 0.689 | 0.317 | 0.646 | 0.642 | 0.534 | 0.448 | 0.484 | 0.621 | 0.697 | 0.796 |
| <i>C. metallidurans</i> vs. control                  | 0.096 | 0.883 | 0.122 | 0.242 | 0.391 | 0.513 | 0.748 | 0.663 | 0.914 | 0.772 | 0.670 | 0.619 | 0.519 | 0.400 |
| <b>Ground and ISS comparisons</b>                    |       |       |       |       |       |       |       |       |       |       |       |       |       |       |
| <i>S. desiccabilis</i> ground vs. ISS Earth gravity  | 0.001 | 0.004 | 0.001 | 0.002 | 0.004 | 0.004 | 0.002 | 0.007 | 0.014 | 0.028 | 0.063 | 0.201 | 0.618 | 0.999 |
| <i>B. subtilis</i> ground vs. ISS Earth gravity      | 0.129 | 0.103 | 0.148 | 0.177 | 0.200 | 0.116 | 0.209 | 0.186 | 0.175 | 0.161 | 0.196 | 0.180 | 0.158 | 0.142 |
| <i>C. metallidurans</i> ground vs. ISS Earth gravity | 0.380 | 0.161 | 0.451 | 0.360 | 0.320 | 0.275 | 0.204 | 0.181 | 0.140 | 0.120 | 0.111 | 0.086 | 0.105 | 0.087 |
| Ground control vs. ISS Earth gravity control         | 0.022 | 0.704 | 0.009 | 0.018 | 0.041 | 0.261 | 0.075 | 0.079 | 0.097 | 0.178 | 0.173 | 0.124 | 0.108 | 0.145 |



**Supplementary Table 5. Quantity of Rare Earth Elements leached in biological**

**experiments as percentage of total concentration in basalt slide.** Tables shown separately for *S. desiccabilis*, *B. subtilis* and *C. metallidurans* and ground controls. Tables show means and standard deviations (%). Mars gravity and Earth gravity refer to simulated Martian (0.4 x g) and terrestrial (1 x g) gravity on the ISS. The concentrations of REEs measured for each experiment were converted to percentages of concentrations in the basalt slide by assuming a mean basalt slide mass of 1.87 g.

| <i>S. desiccabilis</i> |                      |          |                      |          |                       |          |
|------------------------|----------------------|----------|----------------------|----------|-----------------------|----------|
|                        | Microgravity<br>mean | sd       | Mars gravity<br>mean | sd       | Earth gravity<br>mean | sd       |
| La                     | 2.83E-02             | 9.90E-03 | 3.89E-02             | 3.98E-03 | 2.94E-02              | 4.02E-03 |
| Ce                     | 3.50E-02             | 1.14E-02 | 3.66E-02             | 7.67E-03 | 2.84E-02              | 3.90E-03 |
| Pr                     | 2.58E-02             | 9.84E-03 | 3.85E-02             | 1.10E-02 | 2.47E-02              | 2.55E-03 |
| Nd                     | 2.47E-02             | 9.35E-03 | 3.65E-02             | 9.19E-03 | 2.41E-02              | 2.19E-03 |
| Sm                     | 2.53E-02             | 9.94E-03 | 3.57E-02             | 6.29E-03 | 2.50E-02              | 2.04E-03 |
| Eu                     | 2.44E-02             | 7.75E-03 | 3.14E-02             | 3.33E-03 | 2.51E-02              | 1.68E-03 |
| Gd                     | 2.96E-02             | 1.25E-02 | 4.26E-02             | 7.44E-03 | 3.17E-02              | 1.84E-03 |
| Tb                     | 3.91E-02             | 1.28E-02 | 5.34E-02             | 7.19E-03 | 4.12E-02              | 7.30E-04 |
| Dy                     | 3.85E-02             | 1.37E-02 | 5.45E-02             | 7.46E-03 | 4.20E-02              | 2.85E-03 |
| Ho                     | 4.58E-02             | 1.82E-02 | 6.58E-02             | 5.61E-03 | 5.23E-02              | 5.50E-03 |
| Er                     | 5.13E-02             | 2.22E-02 | 7.39E-02             | 4.72E-03 | 6.03E-02              | 7.11E-03 |
| Tm                     | 7.82E-02             | 2.99E-02 | 1.07E-01             | 7.57E-03 | 9.07E-02              | 1.04E-02 |
| Yb                     | 6.18E-02             | 2.77E-02 | 8.93E-02             | 9.09E-03 | 7.17E-02              | 8.85E-03 |
| Lu                     | 8.38E-02             | 3.48E-02 | 1.17E-01             | 1.30E-02 | 9.86E-02              | 1.19E-02 |

| <i>B. subtilis</i> |                      |          |                      |          |                       |          |
|--------------------|----------------------|----------|----------------------|----------|-----------------------|----------|
|                    | Microgravity<br>mean | sd       | Mars gravity<br>mean | sd       | Earth gravity<br>mean | sd       |
| La                 | 6.31E-03             | 2.75E-04 | 4.77E-03             | 1.03E-03 | 7.66E-03              | 2.68E-03 |
| Ce                 | 1.12E-02             | 2.32E-03 | 9.16E-03             | 7.49E-04 | 1.42E-02              | 2.48E-03 |
| Pr                 | 5.83E-03             | 4.28E-04 | 4.66E-03             | 1.32E-03 | 6.55E-03              | 1.99E-03 |
| Nd                 | 5.87E-03             | 3.42E-04 | 4.52E-03             | 1.30E-03 | 6.07E-03              | 1.81E-03 |
| Sm                 | 5.84E-03             | 3.43E-04 | 4.30E-03             | 1.59E-03 | 5.83E-03              | 1.84E-03 |
| Eu                 | 1.04E-02             | 4.69E-04 | 9.28E-03             | 1.17E-03 | 9.90E-03              | 1.00E-03 |
| Gd                 | 6.63E-03             | 2.03E-04 | 4.14E-03             | 1.69E-03 | 6.12E-03              | 2.19E-03 |
| Tb                 | 1.26E-02             | 5.29E-05 | 1.02E-02             | 1.53E-03 | 1.17E-02              | 2.23E-03 |
| Dy                 | 8.97E-03             | 3.56E-04 | 6.65E-03             | 1.24E-03 | 8.27E-03              | 2.00E-03 |
| Ho                 | 9.85E-03             | 5.48E-04 | 6.50E-03             | 1.34E-03 | 8.40E-03              | 2.34E-03 |
| Er                 | 1.02E-02             | 7.35E-04 | 6.24E-03             | 1.47E-03 | 8.17E-03              | 2.64E-03 |
| Tm                 | 2.57E-02             | 1.42E-03 | 1.99E-02             | 1.87E-03 | 2.23E-02              | 2.92E-03 |
| Yb                 | 1.38E-02             | 1.06E-03 | 8.42E-03             | 1.84E-03 | 1.07E-02              | 2.80E-03 |
| Lu                 | 2.96E-02             | 2.04E-03 | 2.15E-02             | 2.04E-03 | 2.54E-02              | 3.71E-03 |

| <b><i>C. metallidurans</i></b> |                              |           |                              |           |                               |           |
|--------------------------------|------------------------------|-----------|------------------------------|-----------|-------------------------------|-----------|
|                                | <b>Microgravity<br/>mean</b> | <b>sd</b> | <b>Mars gravity<br/>mean</b> | <b>sd</b> | <b>Earth gravity<br/>mean</b> | <b>sd</b> |
| La                             | 1.48E-02                     | 1.69E-03  | 1.57E-02                     | 2.23E-03  | 1.27E-02                      | 3.77E-03  |
| Ce                             | 1.42E-02                     | 2.49E-03  | 1.59E-02                     | 1.65E-03  | 1.14E-02                      | 2.93E-03  |
| Pr                             | 1.31E-02                     | 2.24E-03  | 1.35E-02                     | 2.61E-03  | 1.05E-02                      | 3.57E-03  |
| Nd                             | 1.20E-02                     | 2.19E-03  | 1.21E-02                     | 2.59E-03  | 9.95E-03                      | 3.70E-03  |
| Sm                             | 1.23E-02                     | 1.58E-03  | 1.16E-02                     | 2.90E-03  | 9.42E-03                      | 3.61E-03  |
| Eu                             | 1.44E-02                     | 1.34E-03  | 1.36E-02                     | 1.36E-03  | 1.31E-02                      | 2.17E-03  |
| Gd                             | 1.32E-02                     | 1.88E-03  | 1.16E-02                     | 2.08E-03  | 9.67E-03                      | 3.77E-03  |
| Tb                             | 1.98E-02                     | 2.31E-03  | 1.77E-02                     | 2.45E-03  | 1.58E-02                      | 3.86E-03  |
| Dy                             | 1.65E-02                     | 2.67E-03  | 1.41E-02                     | 2.09E-03  | 1.26E-02                      | 3.97E-03  |
| Ho                             | 1.74E-02                     | 3.86E-03  | 1.43E-02                     | 2.29E-03  | 1.31E-02                      | 4.58E-03  |
| Er                             | 1.73E-02                     | 4.15E-03  | 1.39E-02                     | 1.92E-03  | 1.28E-02                      | 4.99E-03  |
| Tm                             | 3.22E-02                     | 5.46E-03  | 2.82E-02                     | 2.34E-03  | 2.75E-02                      | 5.88E-03  |
| Yb                             | 1.82E-02                     | 4.23E-03  | 1.45E-02                     | 2.95E-03  | 1.38E-02                      | 5.55E-03  |
| Lu                             | 3.17E-02                     | 5.25E-03  | 2.77E-02                     | 2.65E-03  | 2.70E-02                      | 6.34E-03  |

| <b>Ground experiment</b> |                                        |           |                                    |           |                                         |           |
|--------------------------|----------------------------------------|-----------|------------------------------------|-----------|-----------------------------------------|-----------|
|                          | <b><i>S. desiccabilis</i><br/>mean</b> | <b>sd</b> | <b><i>B. subtilis</i><br/>mean</b> | <b>sd</b> | <b><i>C. metallidurans</i><br/>mean</b> | <b>sd</b> |
| La                       | 9.43E-03                               | 1.87E-03  | 4.41E-03                           | 1.25E-03  | 1.02E-02                                | 2.04E-03  |
| Ce                       | 1.44E-02                               | 7.41E-04  | 1.11E-02                           | 6.11E-04  | 1.44E-02                                | 5.85E-04  |
| Pr                       | 9.75E-03                               | 1.71E-03  | 4.21E-03                           | 1.09E-03  | 8.56E-03                                | 1.95E-03  |
| Nd                       | 1.02E-02                               | 2.35E-03  | 4.03E-03                           | 1.18E-03  | 7.42E-03                                | 2.05E-03  |
| Sm                       | 1.20E-02                               | 3.31E-03  | 3.81E-03                           | 1.34E-03  | 6.60E-03                                | 2.35E-03  |
| Eu                       | 1.50E-02                               | 2.40E-03  | 8.40E-03                           | 8.19E-04  | 1.13E-02                                | 1.07E-03  |
| Gd                       | 1.59E-02                               | 3.40E-03  | 3.87E-03                           | 1.42E-03  | 5.73E-03                                | 2.45E-03  |
| Tb                       | 2.66E-02                               | 4.92E-03  | 9.36E-03                           | 1.28E-03  | 1.15E-02                                | 2.56E-03  |
| Dy                       | 2.86E-02                               | 4.73E-03  | 6.11E-03                           | 1.06E-03  | 7.77E-03                                | 2.30E-03  |
| Ho                       | 3.88E-02                               | 4.32E-03  | 5.90E-03                           | 9.29E-04  | 7.21E-03                                | 2.40E-03  |
| Er                       | 4.78E-02                               | 4.57E-03  | 5.53E-03                           | 1.32E-03  | 6.38E-03                                | 2.30E-03  |
| Tm                       | 7.98E-02                               | 6.71E-03  | 1.91E-02                           | 1.78E-03  | 1.89E-02                                | 2.93E-03  |
| Yb                       | 6.83E-02                               | 6.24E-03  | 7.58E-03                           | 1.29E-03  | 6.34E-03                                | 2.65E-03  |
| Lu                       | 9.85E-02                               | 1.02E-02  | 2.12E-02                           | 1.51E-03  | 1.81E-02                                | 2.63E-03  |

**Supplemental Table 6. Rare Earth Element (REE) in cell pellets.** Quantity of REEs in cell pellet as a percentage (%) of the total REEs in the pellet and bulk chamber fluid calculated from REE masses. Mars gravity and Earth gravity refer to simulated Martian (0.4 x g) and terrestrial (1 x g) gravity on the ISS. Values are shown as mean  $\pm$  standard deviation. Means above 5 % are shaded in grey.

| Organism/gravity                  |                         | La                | Ce                | Pr                | Nd                | Sm                | Eu               | Gd               | Tb              | Dy              | Ho              | Er              | Tm              | Yb              | Lu              |
|-----------------------------------|-------------------------|-------------------|-------------------|-------------------|-------------------|-------------------|------------------|------------------|-----------------|-----------------|-----------------|-----------------|-----------------|-----------------|-----------------|
| <i>S. desiccabilis</i><br>on ISS  | Microgravity            | 1.61 $\pm$ 0.44   | 1.70 $\pm$ 0.46   | 1.23 $\pm$ 0.43   | 1.33 $\pm$ 0.45   | 1.19 $\pm$ 0.42   | 4.81 $\pm$ 0.86  | 1.21 $\pm$ 0.59  | 0.97 $\pm$ 0.41 | 1.09 $\pm$ 0.46 | 0.97 $\pm$ 0.36 | 1.14 $\pm$ 0.41 | 0.84 $\pm$ 0.27 | 1.57 $\pm$ 0.44 | 1.45 $\pm$ 0.21 |
|                                   | Mars gravity            | 2.57 $\pm$ 0.66   | 5.68 $\pm$ 5.58   | 1.83 $\pm$ 0.43   | 1.93 $\pm$ 0.42   | 1.79 $\pm$ 0.43   | 4.90 $\pm$ 1.25  | 1.69 $\pm$ 0.30  | 1.42 $\pm$ 0.33 | 1.47 $\pm$ 0.35 | 1.49 $\pm$ 0.41 | 1.51 $\pm$ 0.39 | 1.28 $\pm$ 0.32 | 1.86 $\pm$ 0.44 | 2.07 $\pm$ 0.36 |
|                                   | Earth gravity           | 1.59 $\pm$ 0.89   | 1.75 $\pm$ 0.23   | 1.17 $\pm$ 0.59   | 1.33 $\pm$ 0.60   | 0.98 $\pm$ 0.36   | 7.00 $\pm$ 0.78  | 0.96 $\pm$ 0.15  | 0.71 $\pm$ 0.14 | 0.87 $\pm$ 0.08 | 0.88 $\pm$ 0.07 | 0.91 $\pm$ 0.08 | 0.72 $\pm$ 0.03 | 1.36 $\pm$ 0.19 | 1.48 $\pm$ 0.03 |
| <i>B. subtilis</i><br>on ISS      | Microgravity            | 2.33 $\pm$ 0.59   | 8.06 $\pm$ 9.03   | 1.28 $\pm$ 0.28   | 1.59 $\pm$ 0.44   | 1.53 $\pm$ 0.60   | 15.54 $\pm$ 4.08 | 1.07 $\pm$ 0.33  | 0.27 $\pm$ 0.20 | 0.67 $\pm$ 0.32 | 0.76 $\pm$ 0.45 | 1.11 $\pm$ 0.08 | 0.18 $\pm$ 0.19 | 0.92 $\pm$ 0.37 | 0.47 $\pm$ 0.21 |
|                                   | Mars gravity            | 6.42 $\pm$ 0.68   | 4.28 $\pm$ 0.46   | 3.16 $\pm$ 0.50   | 3.59 $\pm$ 0.36   | 2.41 $\pm$ 0.34   | 19.00 $\pm$ 4.63 | 2.98 $\pm$ 0.58  | 0.61 $\pm$ 0.34 | 1.02 $\pm$ 0.57 | 1.48 $\pm$ 0.59 | 2.13 $\pm$ 1.05 | 0.35 $\pm$ 0.49 | 2.11 $\pm$ 1.23 | 0.54 $\pm$ 0.59 |
|                                   | Earth gravity           | 19.99 $\pm$ 14.55 | 34.34 $\pm$ 22.02 | 14.93 $\pm$ 12.87 | 13.24 $\pm$ 10.75 | 10.65 $\pm$ 10.59 | 18.16 $\pm$ 6.10 | 11.26 $\pm$ 8.83 | 4.31 $\pm$ 3.85 | 5.87 $\pm$ 4.88 | 6.02 $\pm$ 4.67 | 6.36 $\pm$ 3.93 | 2.22 $\pm$ 1.89 | 4.81 $\pm$ 3.08 | 2.16 $\pm$ 1.43 |
| <i>C. metallidurans</i><br>on ISS | Microgravity            | 3.18 $\pm$ 1.97   | 4.32 $\pm$ 1.98   | 3.25 $\pm$ 3.07   | 2.20 $\pm$ 0.94   | 2.10 $\pm$ 0.79   | 7.86 $\pm$ 3.40  | 1.62 $\pm$ 0.50  | 0.76 $\pm$ 0.10 | 1.18 $\pm$ 0.29 | 1.02 $\pm$ 0.19 | 1.29 $\pm$ 0.33 | 0.39 $\pm$ 0.26 | 1.31 $\pm$ 0.62 | 0.86 $\pm$ 0.59 |
|                                   | Mars gravity            | 2.46 $\pm$ 1.50   | 10.78 $\pm$ 9.55  | 1.93 $\pm$ 1.50   | 1.93 $\pm$ 1.27   | 1.90 $\pm$ 1.35   | 8.07 $\pm$ 4.25  | 2.09 $\pm$ 1.46  | 1.11 $\pm$ 0.77 | 1.42 $\pm$ 1.10 | 1.61 $\pm$ 1.26 | 1.81 $\pm$ 1.38 | 0.70 $\pm$ 0.71 | 2.06 $\pm$ 1.60 | 1.17 $\pm$ 0.99 |
|                                   | Earth gravity           | 4.34 $\pm$ 2.74   | 5.34 $\pm$ 2.58   | 2.63 $\pm$ 1.82   | 2.81 $\pm$ 1.60   | 2.84 $\pm$ 1.47   | 13.79 $\pm$ 5.64 | 2.31 $\pm$ 1.60  | 1.12 $\pm$ 1.29 | 1.40 $\pm$ 1.16 | 1.49 $\pm$ 1.28 | 1.89 $\pm$ 1.05 | 0.56 $\pm$ 0.67 | 1.68 $\pm$ 1.25 | 1.18 $\pm$ 1.05 |
| Ground 1 g<br>experiment          | <i>S. desiccabilis</i>  | 2.35 $\pm$ 1.05   | 6.66 $\pm$ 7.68   | 1.40 $\pm$ 0.79   | 1.81 $\pm$ 0.91   | 1.63 $\pm$ 0.69   | 7.94 $\pm$ 3.55  | 1.60 $\pm$ 0.93  | 0.84 $\pm$ 0.64 | 1.12 $\pm$ 0.58 | 1.29 $\pm$ 0.70 | 1.35 $\pm$ 0.65 | 0.96 $\pm$ 0.46 | 1.64 $\pm$ 0.67 | 1.85 $\pm$ 0.66 |
|                                   | <i>B. subtilis</i>      | 5.41 $\pm$ 0.72   | 11.98 $\pm$ 15.02 | 2.72 $\pm$ 1.27   | 3.10 $\pm$ 1.15   | 2.71 $\pm$ 0.82   | 12.84 $\pm$ 5.84 | 3.63 $\pm$ 0.49  | 0.61 $\pm$ 0.37 | 1.07 $\pm$ 1.00 | 1.43 $\pm$ 0.91 | 2.33 $\pm$ 0.55 | 0.39 $\pm$ 0.47 | 1.76 $\pm$ 0.66 | 0.89 $\pm$ 0.14 |
|                                   | <i>C. metallidurans</i> | 3.76 $\pm$ 1.46   | 3.24 $\pm$ 0.68   | 2.48 $\pm$ 1.22   | 2.97 $\pm$ 1.27   | 3.98 $\pm$ 1.82   | 22.36 $\pm$ 9.82 | 3.77 $\pm$ 2.08  | 1.35 $\pm$ 0.92 | 1.82 $\pm$ 0.93 | 2.59 $\pm$ 1.57 | 2.98 $\pm$ 1.59 | 0.62 $\pm$ 0.75 | 2.57 $\pm$ 2.00 | 0.87 $\pm$ 0.79 |

**Supplemental Table 7. Final pH values in the different EU solutions.** Solutions were measured at the end of the experiment after sample fixation and return to Earth. The two contaminated control samples are shaded in grey.

| <b>Organism/gravity</b>                   |                                | <b>Sample 1</b> | <b>Sample 2</b> | <b>Sample 3</b> | <b>Mean</b> | <b>sd</b> |
|-------------------------------------------|--------------------------------|-----------------|-----------------|-----------------|-------------|-----------|
| <b><i>S. desiccabilis</i><br/>on ISS</b>  | <b>Microgravity</b>            | 4.31            | 4.31            | 4.28            | 4.30        | 0.02      |
|                                           | <b>Mars gravity</b>            | 4.31            | 4.31            | 4.25            | 4.29        | 0.03      |
|                                           | <b>Earth gravity</b>           | 4.24            | 4.32            | 4.29            | 4.28        | 0.04      |
| <b><i>B. subtilis</i><br/>on ISS</b>      | <b>Microgravity</b>            | 6.13            | 6.11            | 6.11            | 6.12        | 0.01      |
|                                           | <b>Mars gravity</b>            | 6.09            | 5.93            | 6.01            | 6.01        | 0.08      |
|                                           | <b>Earth gravity</b>           | 6.10            | 6.06            | 6.16            | 6.11        | 0.05      |
| <b><i>C. metallidurans</i><br/>on ISS</b> | <b>Microgravity</b>            | 6.36            | 4.90            | 5.90            | 5.72        | 0.75      |
|                                           | <b>Mars gravity</b>            | 4.95            | 5.98            | 5.91            | 5.61        | 0.58      |
|                                           | <b>Earth gravity</b>           | 5.98            | 4.81            | 6.02            | 5.60        | 0.69      |
| <b>Non-biological control<br/>on ISS</b>  | <b>Microgravity</b>            | 4.18            | 4.24            | 4.42            | 4.30        | 0.17      |
|                                           | <b>Mars gravity</b>            | 4.28            | 4.35            | 4.22            | 4.28        | 0.07      |
|                                           | <b>Earth gravity</b>           | 4.29            | 4.46            | 4.26            | 4.34        | 0.11      |
| <b>Ground 1 g experiment</b>              | <b><i>S. desiccabilis</i></b>  | 4.28            | 4.37            | 4.33            | 4.33        | 0.05      |
|                                           | <b><i>B. subtilis</i></b>      | 6.01            | 6.11            | 5.70            | 5.94        | 0.21      |
|                                           | <b><i>C. metallidurans</i></b> | 5.21            | 6.11            | 5.30            | 5.54        | 0.50      |
|                                           | <b>Control (non-biology)</b>   | 4.30            | 4.02            | 5.87            | 4.16        | 0.20      |

**Supplementary Table 8. Acceleration (gravity) measurements.** Values measured during the experiment on the ISS in each of the Experimental Units. The *g* level was measured every ten minutes for the duration of the active experimental phase in KUBIK. Values are shown as mean and standard deviation of these collected measurements.

| Condition     | EU No. | Contents of EU                      | <i>g</i> acceleration measured<br>(mean ± sd) |
|---------------|--------|-------------------------------------|-----------------------------------------------|
| Microgravity  | 1      | <i>S. desiccabilis</i> x 2          | 0.059±0.011                                   |
| Microgravity  | 2      | <i>B. subtilis</i> and control      | 0.054±0.028                                   |
| Microgravity  | 3      | <i>C. metallidurans</i> x 2         | 0.033±0.020                                   |
| Microgravity  | 10     | <i>S. desiccabilis</i> and control  | 0.064±0.036                                   |
| Microgravity  | 11     | <i>B. subtilis</i> x 2              | 0.043±0.024                                   |
| Microgravity  | 12     | <i>C. metallidurans</i> and control | 0.053±0.024                                   |
| Mars gravity  | 13     | <i>S. desiccabilis</i> x 2          | 0.422±0.018                                   |
| Mars gravity  | 14     | <i>S. desiccabilis</i> and control  | 0.411±0.016                                   |
| Mars gravity  | 15     | <i>B. subtilis</i> x 2              | 0.461±0.017                                   |
| Mars gravity  | 16     | <i>B. subtilis</i> and control      | 0.437±0.017                                   |
| Mars gravity  | 17     | <i>C. metallidurans</i> x 2         | 0.447±0.018                                   |
| Mars gravity  | 18     | <i>C. metallidurans</i> and control | 0.389±0.018                                   |
| Earth gravity | 4      | <i>S. desiccabilis</i> x 2          | 0.990±0.028                                   |
| Earth gravity | 5      | <i>S. desiccabilis</i> and control  | 1.047±0.024                                   |
| Earth gravity | 6      | <i>B. subtilis</i> x 2              | 1.039±0.036                                   |
| Earth gravity | 7      | <i>B. subtilis</i> and control      | 1.032±0.036                                   |
| Earth gravity | 8      | <i>C. metallidurans</i> x 2         | 1.036±0.027                                   |
| Earth gravity | 9      | <i>C. metallidurans</i> and control | 1.027±0.025                                   |

**Supplementary Table 9. Final cell numbers in the culture chambers.** Determined by direct microscopic enumeration of cell numbers as described in ref 31. Cell numbers shown as cells/mL (mean  $\pm$  sd).

| <b>Organism/gravity</b>           |                         | <b>Cell numbers</b>           |
|-----------------------------------|-------------------------|-------------------------------|
| <i>S. desiccabilis</i><br>on ISS  | Microgravity            | $(3.63 \pm 2.05) \times 10^9$ |
|                                   | Mars gravity            | $(1.32 \pm 1.17) \times 10^9$ |
|                                   | Earth gravity           | $(1.84 \pm 0.59) \times 10^9$ |
| <i>B. subtilis</i><br>on ISS      | Microgravity            | $(5.38 \pm 2.69) \times 10^7$ |
|                                   | Mars gravity            | $(5.75 \pm 2.07) \times 10^7$ |
|                                   | Earth gravity           | $(3.32 \pm 0.50) \times 10^7$ |
| <i>C. metallidurans</i><br>on ISS | Microgravity            | $(1.01 \pm 0.71) \times 10^9$ |
|                                   | Mars gravity            | $(7.26 \pm 7.19) \times 10^8$ |
|                                   | Earth gravity           | $(2.33 \pm 1.90) \times 10^9$ |
| Ground 1 x g experiment           | <i>S. desiccabilis</i>  | $(6.87 \pm 0.40) \times 10^8$ |
|                                   | <i>B. subtilis</i>      | $(8.27 \pm 1.13) \times 10^7$ |
|                                   | <i>C. metallidurans</i> | $(1.83 \pm 0.02) \times 10^9$ |
